# Supplementary material for: Incidence, risk factors, and impact of early cardiac toxicity after allogeneic hematopoietic cell transplant
Source: PubMed Central journal article supplement — Blood Adv. 2022 Dec 5;7(10):2018–31. doi: 10.1182/bloodadvances.2022008792 (PMC10188633; doi:10.1182/bloodadvances.2022008792), 2022-12-05
Supplement: BLOODA_ADV-2022-008792-mmc1.pdf [file BLOODA_ADV-2022-008792-mmc1.pdf]

**SUPPLEMENTARY MATERIAL**

**Supplementary Table 1: Impact of Acute Cardiac Toxicity in Post-Transplant Outcomes: Univariate analysis**

| Univariate Analysis                                          | Risk factors for Overall Survival |         | Risk factors for Non-Relapse Mortality |         |
|--------------------------------------------------------------|-----------------------------------|---------|----------------------------------------|---------|
|                                                              | HR (95% CI)                       | P value | HR (95% CI)                            | P value |
| <b>Early Cardiac Toxicity</b><br>Time-dependent variable     | 2.95 (1.81-4.79)                  | <0.001  | 5.16 (2.91-9.15)                       | <0.001  |
| <b>GVHD Prophylaxis</b><br>PTCY-based (vs. others)           | 0.79 (0.56-1.12)                  | 0.19    | 1.14 (0.70-1.85)                       | 0.58    |
| <b>TBI</b><br>Yes (vs. No)                                   | 0.90 (0.62-1.31)                  | 0.60    | 1.17 (0.72-1.91)                       | 0.51    |
| <b>Age at allo-HCT</b><br>≥55 years ( vs <55)                | 1.68 (1.19-2.36)                  | 0.002   | 1.613(1.02-2.59)                       | 0.04    |
| <b>KPS</b><br>≤80% (vs 90-100%)                              | 1.58 (1.09-2.30)                  | 0.014   | 1.51 (0.91-2.53)                       | 0.11    |
| <b>HCT-CI score</b><br>≥3 (vs < 3)                           | 1.58 (1.09-2.27)                  | 0.014   | 1.19 (0.69-2.02)                       | 0.52    |
| <b>Donor Selection</b><br>Haplo and MMUD (vs. others)        | 0.98 (0.68-1.41)                  | 0.91    | 1.45 (0.91-2.33)                       | 0.12    |
| <b>Intensity of the Conditioning Regimen</b><br>RIC (vs MAC) | 1.28 (0.90-1.80)                  | 0.15    | 1.12 (0.70-1.78)                       | 0.63    |
| <b>Grade 3-4 acute GVHD</b><br>Time-dependent variable       | 4.30 (2.79-6.63)                  | <0.001  | 6.07 (3.48-10.61)                      | <0.001  |

**Legend:** Post-transplant follow-up has been censored at 2-years.

GVHD: Graft-versus-Host Disease; KPS: Karnofsky Performance Status; HCT-CI: Hematopoietic Cell Transplantation-specific Comorbidity Index; Haplo: Haploidentical; MMUD: Mismatched unrelated donor; MAC: Myeloablative; RIC: Reduced Intensity; HR: Hazard Ratio; CI: Confidence Interval

1  
2  
3

**Supplementary Table 2: Baseline Characteristics According to Donor Type**

|                                                                | Allo-HCT with PTCY-based prophylaxis N=128 (%) | Allo-HCT with other prophylaxis N= 151 | P value |
|----------------------------------------------------------------|------------------------------------------------|----------------------------------------|---------|
| <b>Age Median (range)</b><br>≥55 years                         | 58 (45.3)                                      | 70 (46.3)                              | 0.861   |
| <b>Sex</b><br>Female                                           | 52 (40.6)                                      | 74 (49.0)                              | 0.161   |
| <b>History of smoking</b><br>Yes                               | 33 (25.7)                                      | 55 (36.4)                              | 0.920   |
| <b>Relevant Comorbidities</b>                                  |                                                |                                        |         |
| <b>History of HTN</b>                                          | 33 (25.7)                                      | 19 (12.5)                              | 0.035   |
| <b>History of Hyperlipidemia</b>                               | 11 (8.5)                                       | 9 (5.9)                                | 0.295   |
| <b>Diabetes Mellitus</b>                                       | 17 (13.2)                                      | 21 (13.9)                              | 0.879   |
| <b>Pre-existing cardiac morbidity</b>                          | 18 (14.0)                                      | 16 (10.6)                              | 0.378   |
| Arrhythmia                                                     | 7 (5.4)                                        | 1 (0.6)                                | 0.085   |
| Heart Failure                                                  | 3 (2.3)                                        | 3 (1.9)                                | 0.838   |
| Coronary disease                                               | 3 (2.3)                                        | 3 (1.9)                                | 0.796   |
| Pericardial Disorders                                          | 1 (0.78)                                       | 3 (1.9)                                | 0.399   |
| Other*                                                         | 4 (3.1)                                        | 5 (3.3)                                | 0.982   |
| <b>LVEF &lt; 50%**</b>                                         | 2 (1.5)                                        | 3 (1.9)                                | 0.523   |
| <b>Baseline Diagnosis</b>                                      |                                                |                                        |         |
| AML                                                            | 40 (31.3)                                      | 62 (41.1)                              | -       |
| ALL                                                            | 22 (17.2)                                      | 17 (11.2)                              |         |
| MDS                                                            | 22 (17.2)                                      | 29 (19.2)                              |         |
| MPN                                                            | 10 (7.8)                                       | 10 (6.7)                               |         |
| Lymphoproliferative disorders                                  | 13 (10.1)                                      | 20 (13.2)                              |         |
| PCD                                                            | 8 (6.3)                                        | 1 (0.6)                                |         |
| Other                                                          | 13 (10.1)                                      | 12 (8)                                 |         |
| <b>Treatment with antracyclins before allo-HCT</b><br>Yes      | 80 (62.5)                                      | 103 (68.2)                             | 0.317   |
| <b>Treatment with cyclophosphamide before allo-HCT+</b><br>Yes | 26 (20.3)                                      | 25 (16.5)                              | 0.419   |
| <b>HCT-CI</b><br>>3                                            | 39 (30.4)                                      | 34 (22.5)                              | 0.132   |
| <b>Karnofsky Performance Status</b><br>70-80%                  | 31 (24.2)                                      | 37 (24.5)                              | 0.708   |
| <b>Conditioning</b>                                            |                                                |                                        |         |
| Myeloablative                                                  | 66 (51.5)                                      | 73 (48.3)                              | 0.592   |
| Reduced intensity                                              | 62 (49.5)                                      | 78 (51.7)                              |         |
| <b>Total Body Irradiation</b>                                  |                                                |                                        |         |
| Yes (any dose)                                                 | 44 (34.3)                                      | 20 (13.2)                              | 0.001   |
| 2 Gy                                                           | 16 (13.3)                                      | 0                                      |         |
| 8 Gy                                                           | 8 (6.2)                                        | 0                                      |         |
| 12 Gy                                                          | 20 (15.6)                                      | 20 (100)                               |         |
| <b>Stem cell source:</b><br>Peripheral blood                   | 6 (4.7)                                        | 7 (4.6)                                | 0.984   |

4  
5  
6  
7  
8  
9  
10  
11  
12  
13  
14  
15

Other\*: Degenerative aortic valve disease with severe insufficiency (n=1), aneurysm of the ventricular septum (n=1), arterial ductus in childhood, intervened (n=1), atrial septal defect causing left to right shunt (n=1), sinus bradycardia with ECHO abnormalities (n=1), right or left bundle branch block with impaired mobility on ECHO (n=4).

\*\*Three out of the 5 patients with FVEF<50% had echocardiographic abnormalities or history of cardiac disease and were additionally accounted in the pre-existing cardiac morbidity category (others).

+Not accounted if patients received Cy as part of the conditioning regimen or PTCY.

PTCY: Post-transplant cyclophosphamide; Allo-HCT: Allogeneic Hematopoietic Cell Transplantation; HTN: Hypertension; AML: Acute myeloid leukemia, ALL: Acute lymphoblastic Leukemia; MDS: Myelodysplastic Syndrome; MPN: Myeloproliferative disorder; PCD: Plasma Cell Dyscrasia; HCT-CI: Hematopoietic Cell Transplantation-Comorbidity Index.
